# Supplementary material for: Co-Immobilization of Lactase and Glucose Isomerase on the Novel g-C3N4/CF Composite Carrier for Lactulose Production
Source: MDPI journal article supplement (doi:10.3390/nano12234290), 2022-12-02
Supplement: s1 [file s1]

Supplementary materials

Table S1. Surface element composition of CF, g-C<sub>3</sub>N<sub>4</sub>, and g-C<sub>3</sub>N<sub>4</sub>/CF

| Carrier type                        | Element content (%) |       |       |       |       |
|-------------------------------------|---------------------|-------|-------|-------|-------|
|                                     | C                   | O     | N     | O/C   | N/C   |
| CF                                  | 81.22               | 17.54 | 1.24  | 21.59 | 1.53  |
| g-C <sub>3</sub> N <sub>4</sub>     | 44.79               | 2.69  | 52.52 | 6.01  | 117.3 |
| g-C <sub>3</sub> N <sub>4</sub> /CF | 72.44               | 13.52 | 14.03 | 18.66 | 19.37 |

Note: The CF referred to the carbon fibers without reacting with melamine. The g-C<sub>3</sub>N<sub>4</sub> referred to the pure g-C<sub>3</sub>N<sub>4</sub>, which was synthesized by calcining the melamine directly in 550°C for 3 h. The g-C<sub>3</sub>N<sub>4</sub>/CF referred to the g-C<sub>3</sub>N<sub>4</sub>/CF composite carrier synthesized by being calcined with melamine and CF in 550°C for 3 h.

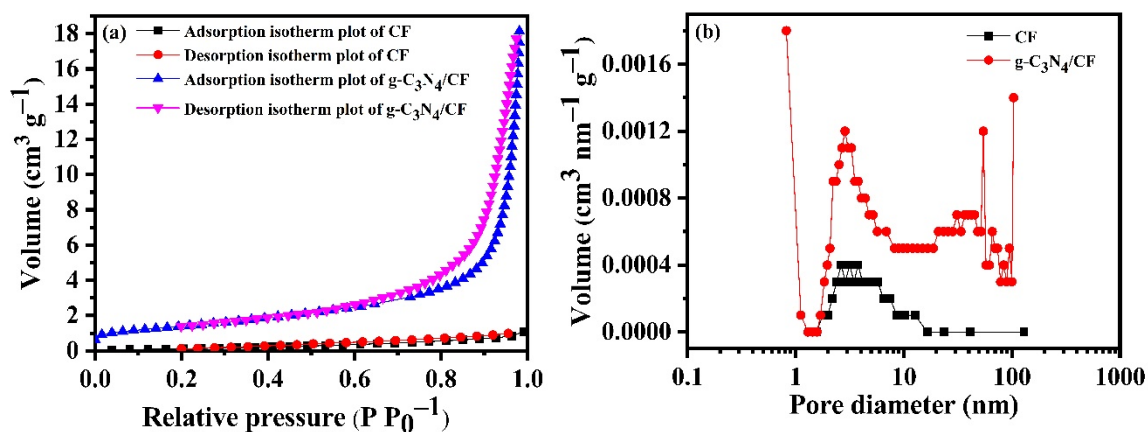

**Figure S1.** N<sub>2</sub> adsorption-desorption isotherms and pore size distributions of different carriers. (a) N<sub>2</sub> adsorption-desorption isotherms for CF and g-C<sub>3</sub>N<sub>4</sub>/CF (Adsorption isotherm plot of CF, black line. Desorption isotherm plot of CF, red line. Adsorption isotherm plot of g-C<sub>3</sub>N<sub>4</sub>/CF, blue line. Desorption isotherm plot of g-C<sub>3</sub>N<sub>4</sub>/CF, purple line.). (b) Pore size distribution of CF and g-C<sub>3</sub>N<sub>4</sub>/CF (The CF, black line. The g-C<sub>3</sub>N<sub>4</sub>/CF, red line).

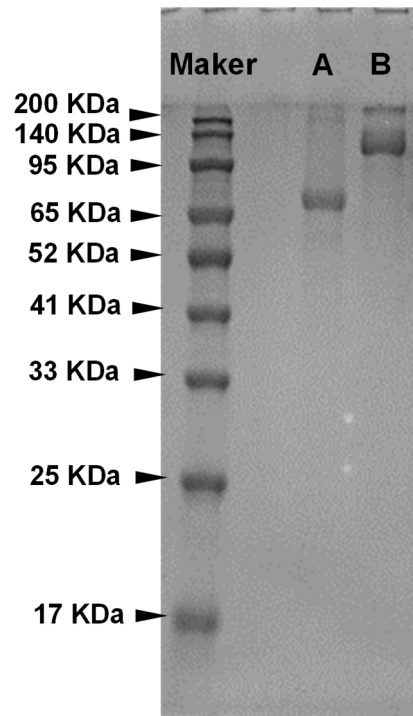

**Figure S2.** SDS-PAGE analysis of glucose isomerase and lactase. In each sample lane, 10.0  $\mu$ l of protein sample was added. Lane M: protein marker, lane A: glucose isomerase, lane B: lactase.

**Table S2.** Effect of immobilization conditions on enzyme activity

|                                      | Lactase activity     | Glucose isomerase activity |
|--------------------------------------|----------------------|----------------------------|
|                                      | (U g <sup>-1</sup> ) | (U g <sup>-1</sup> )       |
| Before the immobilization conditions | 5.90±0.07            | 58.94±1.60                 |
| After the immobilization conditions  | 5.13±0.09            | 49.02±0.35                 |

Notes: the immobilization condition referred to the shaking at 30°C, 160 r min<sup>-1</sup>, for 5 h.

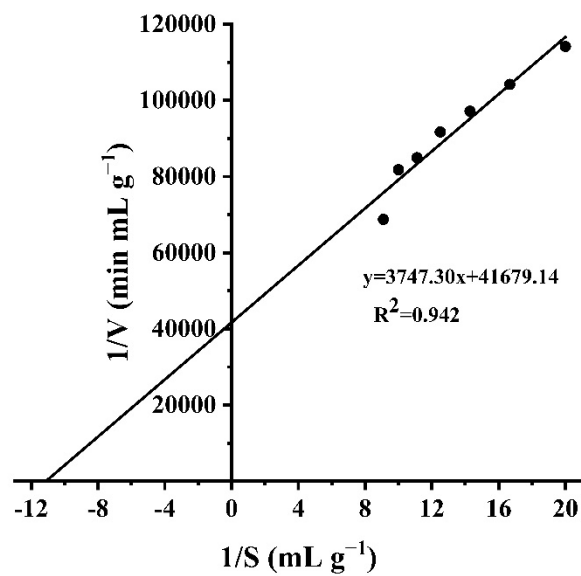

**Figure S3.** Lineweaver-Burk plots of the co-immobilized enzyme. The  $K_m$  of the immobilized and free enzymes was determined by using a series of concentrations of the lactose/fructose mixture (10% lactose and 2% fructose) as the substrate according to the Michaelis-Menten kinetics.
